# Supplementary material for: Efficient immobilization of the enzyme and substrate for a single-step caspase-3 inhibitor assay using a combinable PDMS capillary sensor array
Source: Royal Society of Chemistry journal article supplement (doi:10.1039/c3ra46976j), 2014-01-01
Supplement: c3ra46976j.pdf [file c3ra46976j.pdf]

## Supporting Information

### Efficient Immobilization of Enzyme and Substrate for Single-Step Caspase-3 Inhibitor Assay Using Combinable PDMS Capillary Sensor Array

Tadashi Ishimoto, Kaede Jigawa, Terence G. Henares, Kenji Sueyoshi, Tatsuro Endo, Hideaki Hisamoto

#### Effect of glutaraldehyde (GA) on the activity of immobilized caspase-3

To clarify the effect of GA on the activity of immobilized caspase-3, the following experiment was carried out. First, the PEG solution containing caspase-3 ( $0.2 \mu\text{M}$ ) was introduced into two PDMS channels. After drying, GA solution (2.5%) was introduced into one of the two channels. Following the drying process, two PDMS channels had equal amounts of immobilized caspase-3; however, one of them also contained GA. After solutions of fluorescent substrate ( $10^{-4} \text{M}$ ) were introduced into both channels, the fluorescence response of the channel containing GA was weaker, indicating that GA inhibited the caspase-3 activity.

#### Method

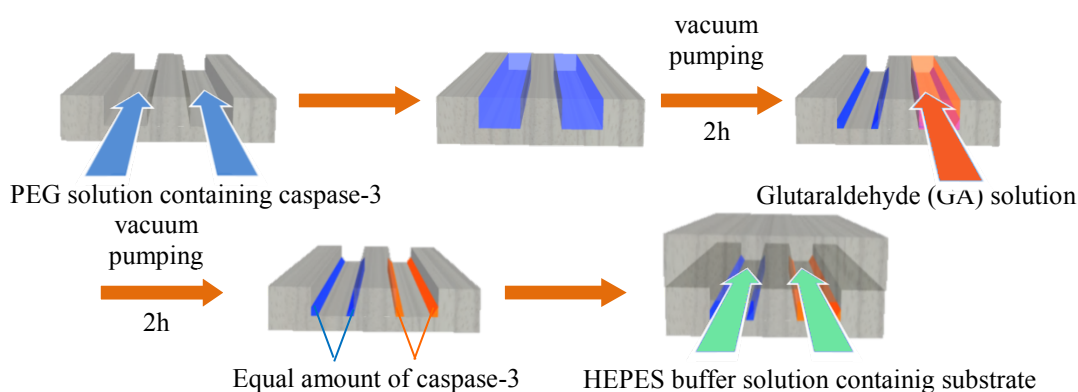

#### Result

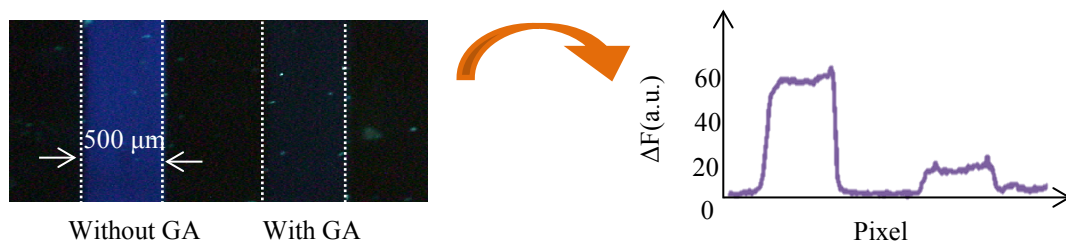

Fig. S1: Effect of GA on caspase-3 activity
